# Supplementary material for: Characterization of Adipogenic Chemicals in Three Different Cell Culture Systems: Implications for Reproducibility Based on Cell Source and Handling
Source: PubMed Central journal article supplement (PMC5296734; doi:10.1038/srep42104), 2017-02-08
Supplement: srep42104-s1.pdf [file srep42104-s1.pdf]

1 Supplemental Information

2  
3  
4 **Characterization of Adipogenic Chemicals in Three Different Cell Culture Systems:**  
5 **Implications for Reproducibility and Variations Based on Cell Source and Handling**

6 Christopher D. Kassotis<sup>1</sup>, Lauren Masse<sup>2</sup>, Stephanie Kim<sup>2</sup>, Jennifer J. Schlezinger<sup>2</sup>, Thomas F.  
7 Webster<sup>2</sup>, and Heather M. Stapleton<sup>1,\*</sup>  
8

9 <sup>1</sup>Nicholas School of the Environment, Duke University, Durham, NC 27708

10 <sup>2</sup>Department of Environmental Health, Boston University School of Public Health, Boston, MA  
11 02118

12 \*corresponding author: heather.stapleton@duke.edu  
13

14 **Contents**

15 Table S1, Receptor ligand activities vary between cell lines and sources Page S2  
16 Table S2, List of primers used for qPCR Page S3  
17 Figure S1, Representative imaging of seven-day differentiated adipocytes Page S5  
18 Figure S2, Representative imaging of ten-day differentiated adipocytes Page S6  
19 Figure S3, Representative imaging of fourteen-day differentiated adipocytes Page S7  
20 Figure S4, Positive controls induce varied adipogenic activities between cell lines Page S8  
21 Figure S5, Negative controls induce varied adipogenic activities between cell lines Page S9  
22

23 Table S1. Receptor ligand activities vary between cell lines and sources.

| Receptor                               | ATCC 3T3-L1 | Zenbio 3T3-L1 | OP9  |
|----------------------------------------|-------------|---------------|------|
| <i>PPAR<math>\gamma</math></i> agonism | +++         | +++           | +++  |
| <i>LXR</i> agonism                     | +           | +             | -    |
| <i>GR</i> agonism                      | ++++*       | ++++*         | +    |
| <i>RXR</i> agonism                     | ++          | +             | ++++ |
| <i>TR</i> antagonism                   | +           | ++            | -    |
| <i>TR</i> agonism                      | -           | -             | -    |
| <i>AR</i> antagonism                   | +           | +             | +    |
| <i>ER</i> agonism                      | -           | -             | -    |

24 *Descriptive overview of receptor pathway testing using ligands for specific nuclear receptors*  
 25 *involved in adipogenesis. ATCC 3T3-L1, Zenbio 3T3-L1, and OP9 cells were differentiated as*  
 26 *described in Methods and assessed for adipocyte differentiation (Nile Red staining of lipid*  
 27 *accumulation) and cell proliferation (Hoechst staining) following seven days (OP9) or ten days*  
 28 *(3T3-L1) of treatment with positive control chemicals. Testing of PPAR $\gamma$  utilized rosiglitazone,*  
 29 *LXR used GW3965, GR used dexamethasone, RXR used LG100268, TR antagonism used I-850,*  
 30 *TR agonism used triiodothyronine, AR used flutamide, and ER used 17 $\beta$ -estradiol.*  
 31 *PPAR $\gamma$  = peroxisome proliferator activated receptor gamma, LXR = liver X receptor, GR =*  
 32 *glucocorticoid receptor, RXR = retinoid X receptor, TR = thyroid receptor, AR = androgen*  
 33 *receptor, ER = estrogen receptor.*  
 34 *Activities defined as follows: - = 0-7% relative triglyceride accumulation, + = 8-25%, ++ = 26-*  
 35 *50%, +++ = 51-75%, ++++ = 76-100%.*  
 36 *\* = superinduction: Zenbio and ATCC 3T3-L1 cells exhibited approximately 300% and 150%*  
 37 *relative triglyceride accumulation, respectively.*  
 38

39 Table S2. List of primers used for qPCR.

| Primer               | Manufacturer | Sequence/Catalog #                                           |
|----------------------|--------------|--------------------------------------------------------------|
| <i>Actb</i>          | IDT          | F: CTCTGGCTCCTAGCACCATGAAGA<br>R: GTAAAACGCAGCTCAGTAACAGTCCG |
| <i>B2m</i>           | IDT          | F: CTGCTACGTAACACAGTTCCACCC<br>R: CATGATGCTTGATCACATGTCTCG   |
| <i>Esr1 (Nr3a1)</i>  | Qiagen       | Cat # QT01075641                                             |
| <i>Esr2 (Nr3a2)</i>  | Qiagen       | Cat # QT01761879                                             |
| <i>Gcr (Nr3c1)</i>   | Qiagen       | Cat # QT01757735                                             |
| <i>Lxra (Nr1h3)</i>  | IDT          | F: GAGTTGTGGAAGACAGAACCTCAA<br>R: GGGCATCCTGGCTTCCTC         |
| <i>Lxrb (Nr1h2)</i>  | IDT          | F: CCCACAAGTTCTCTGGACAC<br>R: TGGCGGAGGTACTGGGC              |
| <i>Nurr1 (Nr4a2)</i> | Qiagen       | Cat # QT00106407                                             |
| <i>Ppara (Nr1c1)</i> | IDT          | F: GCGTACGGCAATGGCTTTAT<br>R: GAACGGCTTCCTCAGGTTCTT          |
| <i>Ppard (Nr1c2)</i> | Qiagen       | Cat # QT00166292                                             |
| <i>Pparg (Nr1c3)</i> | IDT          | F: TGGGTGAAACTCTGGGAGATTC<br>R: AATTTCTTGTGAAGTGCTCATAGGC    |
| <i>Rara (Nr1b1)</i>  | Qiagen       | Cat # QT00125958                                             |
| <i>Rarb (Nr1b2)</i>  | Qiagen       | Cat # QT00151956                                             |
| <i>Rarg (Nr1b3)</i>  | Qiagen       | Cat # QT01554322                                             |
| <i>Rn18s</i>         | IDT          | F: GTAACCCGTTGAACCCCAT<br>R: CCATCCAATCGGTAGTAGCG            |
| <i>Rxra (Nr2b1)</i>  | IDT          | F: TACCCACCACACCCACATTG<br>R: GCCTAGTGGCGGCTTGATATC          |
| <i>Rxrb (Nr2b2)</i>  | IDT          | F: GAGCTCCTCATTGCGTCCTT<br>R: GCGGAATGGGCTGAGTTTC            |

|                     |     |                                                      |
|---------------------|-----|------------------------------------------------------|
| <i>Rxrg (Nr2b3)</i> | IDT | F: CAGGTCTGCCTGGGATTGGA<br>R: GTTGAGTTCTCCACGTTTCATG |
|---------------------|-----|------------------------------------------------------|

40

41 *Primers used, manufacturers, and sequence or catalog numbers for all genes tested by qPCR to*  
42 *assess adipogenic pathways.*

43

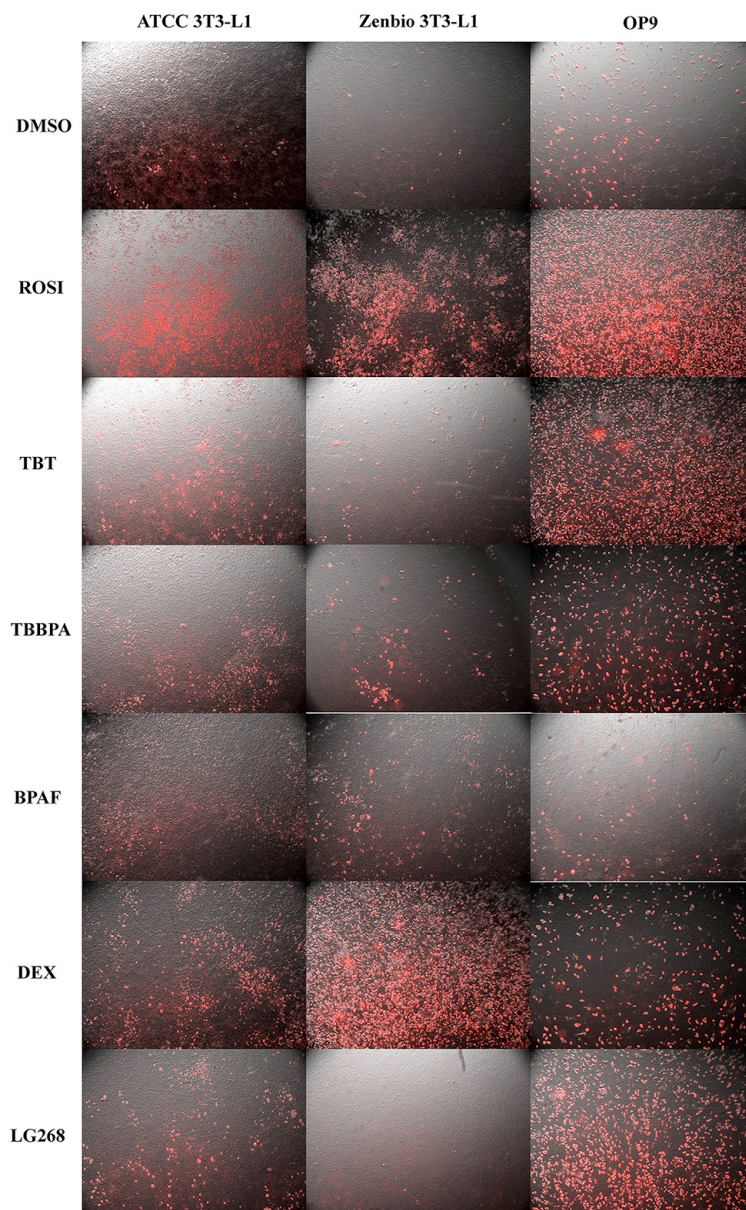

44

45

**Supplemental Figure 1: Representative imaging of seven-day differentiated adipocytes.**

46

*ATCC 3T3-L1, Zenbio 3T3-L1, and OP9 cells were differentiated as described in Methods in 12-*

47

*well Greiner Bio-One plates and assessed for adipocyte differentiation (Nile Red staining of lipid*

48

*accumulation) following seven days treatment with positive control chemicals. Differentiated*

49

*cells were imaged at 40x magnification using a Zeiss Lumar fluorescent stereoscope in both*

50

*bright field and Rhodamine (red) imaging mode. Fluorescent lipid staining images were merged*

51

*into bright field images for final presentation. Representative images provided of triglyceride*

52

*accumulation in ATCC 3T3-L1 cells (column 1), Zenbio 3T3-L1 cells (column 2), and OP9 cells*

53

*(column 3). Concentrations of test ligands selected to be the lowest concentration that exhibited*

54

*maximal differentiation across most or all cell lines.*

55

*VEH = 0.1% DMSO vehicle control, RSG = 100 nM rosiglitazone, TBT = 100 nM tributyltin*

56

*chloride, TBBPA = 10  $\mu$ M tetrabrominated bisphenol A, BPAF =  $\mu$ M bisphenol AF, DEX = 10*

57

*nM dexamethasone, LG268 = 10 nM LG100268.*

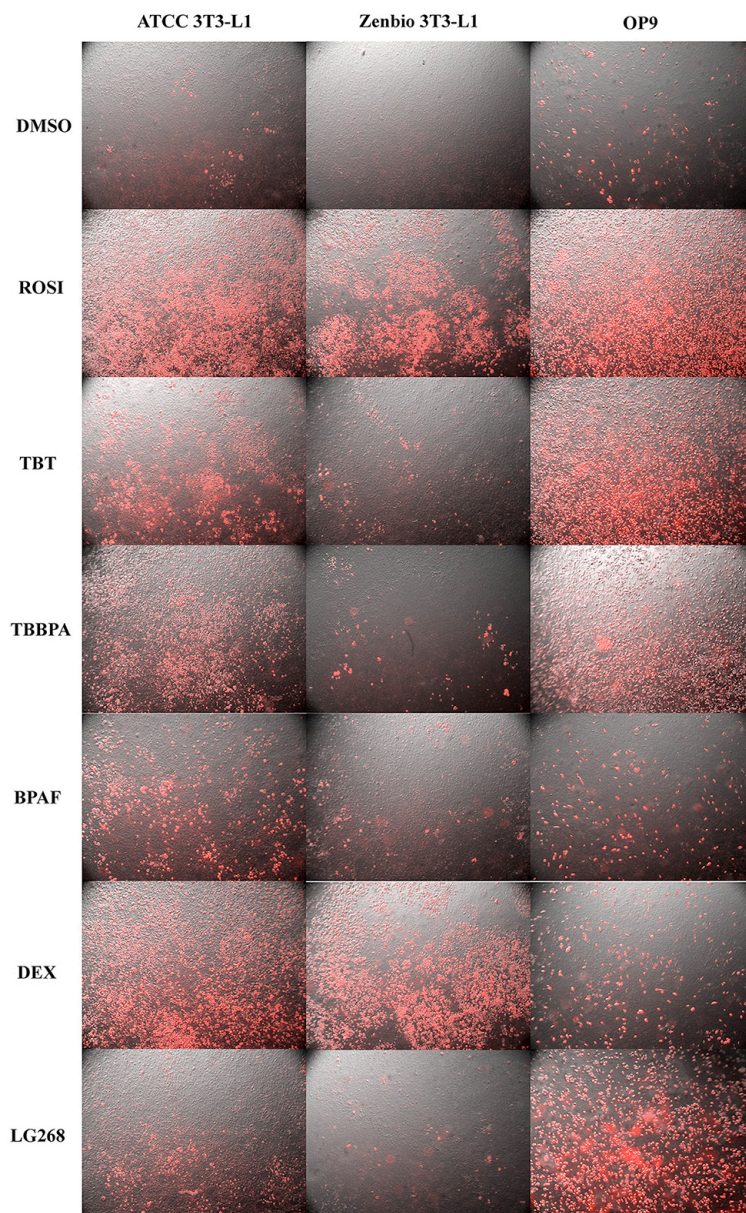

58  
59 **Supplemental Figure 2: Representative imaging of ten-day differentiated adipocytes.** *ATCC*  
60 *3T3-L1*, *Zenbio 3T3-L1*, and *OP9* cells were differentiated as described in *Methods* in 12-well  
61 *Greiner Bio-One* plates and assessed for adipocyte differentiation (Nile Red staining of lipid  
62 accumulation) following ten days treatment with positive control chemicals. Differentiated cells  
63 were imaged at 40x magnification using a *Zeiss Lumar* fluorescent stereoscope in both bright  
64 field and Rhodamine (red) imaging mode. Fluorescent lipid staining images were merged into  
65 bright field images for final presentation. Representative images provided of triglyceride  
66 accumulation in *ATCC 3T3-L1* cells (column 1), *Zenbio 3T3-L1* cells (column 2), and *OP9* cells  
67 (column 3). Concentrations of test ligands selected to be the lowest concentration that exhibited  
68 maximal differentiation across most or all cell lines.  
69 *VEH* = 0.1% DMSO vehicle control, *RSG* = 100 nM rosiglitazone, *TBT* = 100 nM tributyltin  
70 chloride, *TBBPA* = 10  $\mu$ M tetrabrominated bisphenol A, *BPAF* =  $\mu$ M bisphenol AF, *DEX* = 10  
71 nM dexamethasone, *LG268* = 10 nM LG100268.

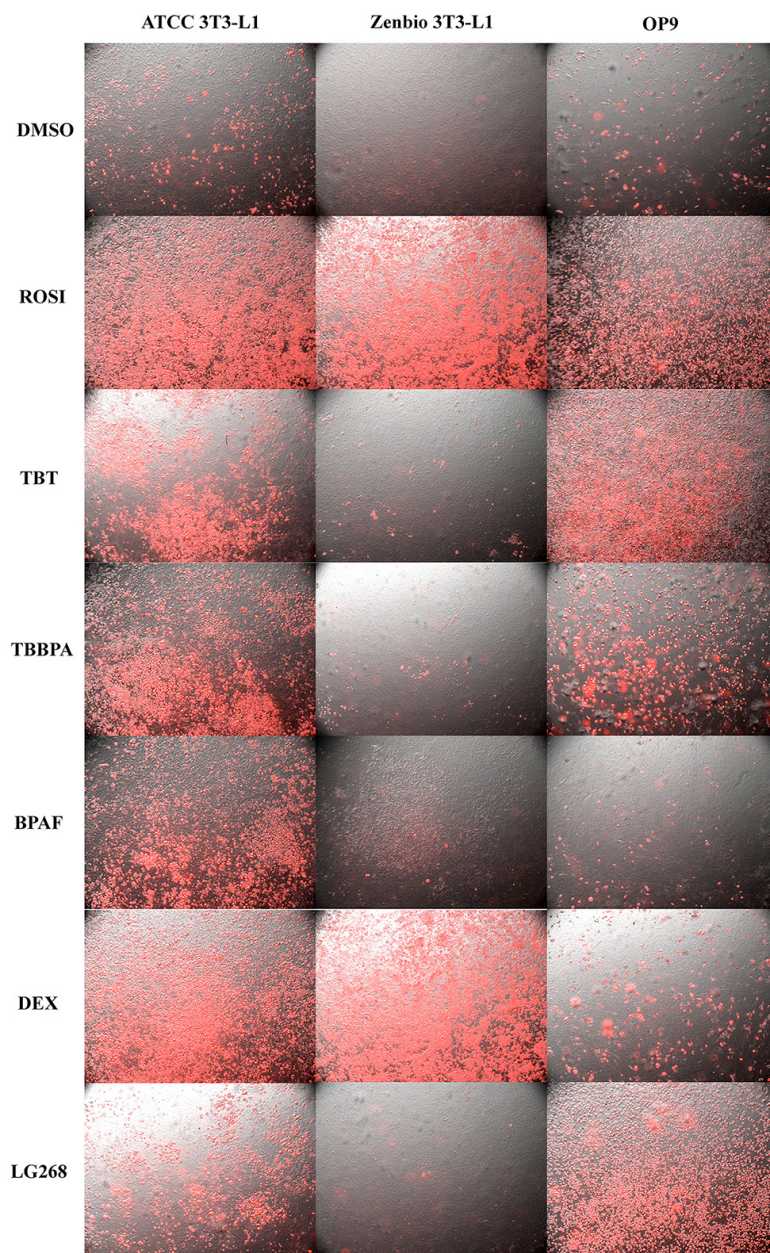

72

73

**Supplemental Figure 3: Representative imaging of fourteen-day differentiated adipocytes.**

74

*ATCC 3T3-L1, Zenbio 3T3-L1, and OP9 cells were differentiated as described in Methods in 12-*

75

*well Greiner Bio-One plates and assessed for adipocyte differentiation (Nile Red staining of lipid*

76

*accumulation) following fourteen days treatment with positive control chemicals. Differentiated*

77

*cells were imaged at 40x magnification using a Zeiss Lumar fluorescent stereoscope in both*

78

*bright field and Rhodamine (red) imaging mode. Fluorescent lipid staining images were merged*

79

*into bright field images for final presentation. Representative images provided of triglyceride*

80

*accumulation in ATCC 3T3-L1 cells (column 1), Zenbio 3T3-L1 cells (column 2), and OP9 cells*

81

*(column 3). Concentrations of test ligands selected to be the lowest concentration that exhibited*

82

*maximal differentiation across most or all cell lines.*

83

*VEH = 0.1% DMSO vehicle control, RSG = 100 nM rosiglitazone, TBT = 100 nM tributyltin*

84

*chloride, TBBPA = 10  $\mu$ M tetrabrominated bisphenol A, BPAF =  $\mu$ M bisphenol AF, DEX = 10*

85

*nM dexamethasone, LG268 = 10 nM LG100268.*

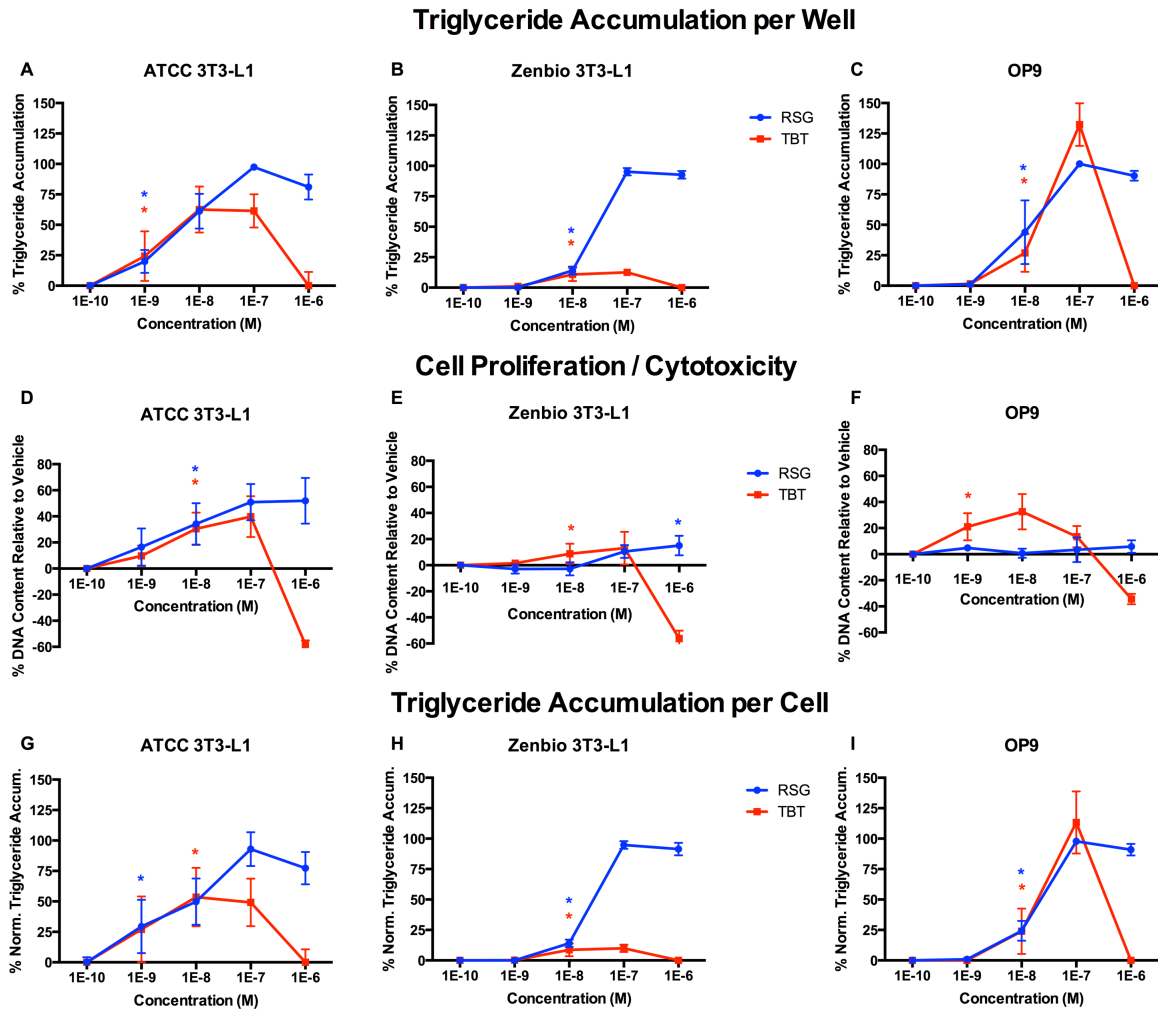

87  
 88 **Supplemental Figure 4: Positive Controls Induce Varied Adipogenic Activities Between Cell**  
 89 **Lines.** ATCC 3T3-L1, Zenbio 3T3-L1, and OP9 cells were differentiated as described in Methods  
 90 and assessed for adipocyte differentiation (Nile Red staining of lipid accumulation) and cell  
 91 proliferation (Hoechst staining) following seven days (OP9) or ten days (3T3-L1) of treatment  
 92 with positive control chemicals. Percent raw triglyceride accumulation per well for rosiglitazone  
 93 (RSG) and tributyltin chloride (TBT) in ATCC 3T3-L1 cells (A), Zenbio 3T3-L1 cells (B),  
 94 and OP9 cells (C). Increase (cell proliferation) or decrease (potential cytotoxicity) in DNA content  
 95 relative to vehicle control for test chemicals in ATCC 3T3-L1 cells (D), Zenbio 3T3-L1 cells (E),  
 96 and OP9 cells (F). Percent normalized triglyceride accumulation per cell (normalized to DNA  
 97 content) for test chemicals in ATCC 3T3-L1 cells (G), Zenbio 3T3-L1 cells (H), and OP9 cells (I).  
 98 TBT response is provided as relative activity to maximal rosiglitazone. Data presented as mean  $\pm$   
 99 SE from three independent experiments. \* indicates lowest concentration with significant  
 100 increase in response over vehicle control,  $p < 0.05$ , as per linear mixed effect model in SAS.



### Inhibition of Triglyceride Accumulation per Well

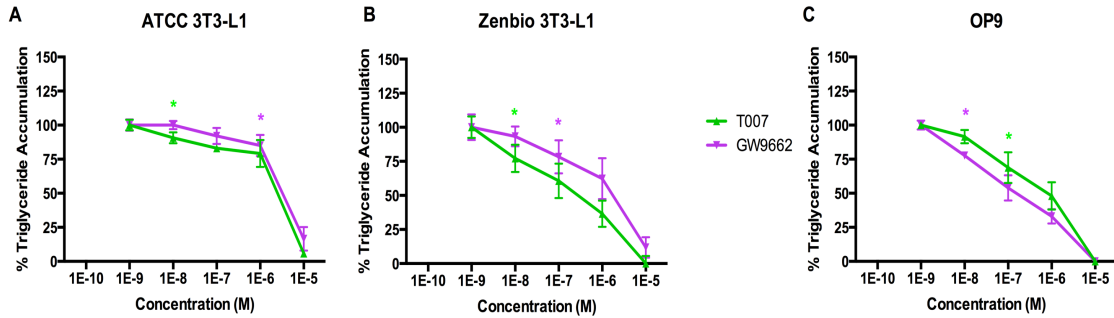

### Cell Proliferation / Cytotoxicity

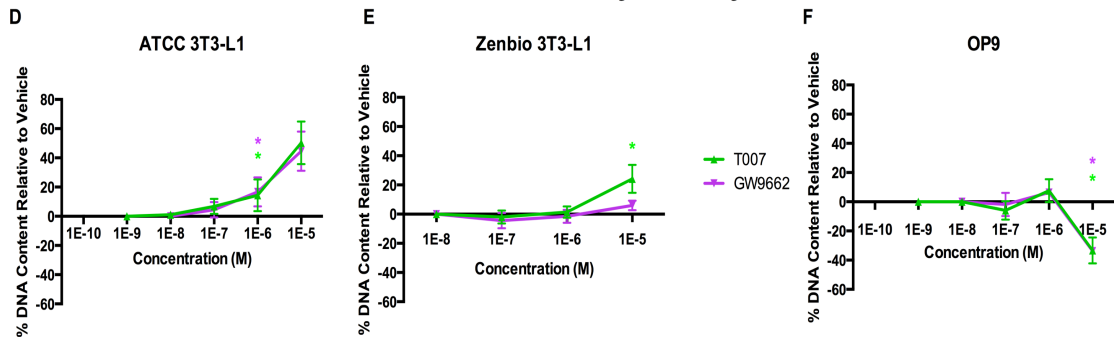

### Inhibition of Triglyceride Accumulation per Cell

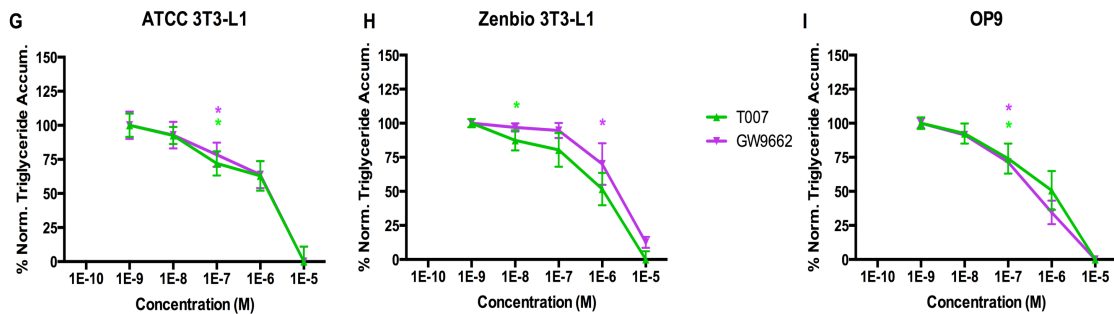

101

102 **Supplemental Figure 5: Negative Controls Induce Varied Adipogenic Activities Between**  
 103 **Cell Lines.** *ATCC 3T3-L1*, *Zenbio 3T3-L1*, and *OP9* cells were differentiated as described in  
 104 *Methods* and assessed for adipocyte differentiation (Nile Red staining of lipid accumulation) and  
 105 cell proliferation (Hoechst staining) following seven days (*OP9*) or ten days (*3T3-L1*) of  
 106 treatment with negative control chemicals. Percent raw triglyceride accumulation per well  
 107 relative to half maximal rosiglitazone response for T0070907 (T007), and GW9662 in *ATCC*  
 108 *3T3-L1* cells (A), *Zenbio 3T3-L1* cells (B), and *OP9* cells (C). Increase (cell proliferation) or  
 109 decrease (potential cytotoxicity) in DNA content relative to half maximal rosiglitazone for test  
 110 chemicals in *ATCC 3T3-L1* cells (D), *Zenbio 3T3-L1* cells (E), and *OP9* cells (F). Percent  
 111 normalized triglyceride accumulation per cell (normalized to DNA content) for test chemicals in  
 112 *ATCC 3T3-L1* cells (G), *Zenbio 3T3-L1* cells (H), and *OP9* cells (I). T007/GW9662 inhibition is  
 113 of half maximal rosiglitazone in each respective cell line, set to 100% for complete absence of  
 114 inhibition and decreasing to 0% triglyceride accumulation at 100% inhibition. Data presented as  
 115 mean  $\pm$  SE from three independent experiments. \* indicates lowest concentration with significant  
 116 increase in response over vehicle control,  $p < 0.05$ , as per one-linear mixed effect model in SAS.  
 117
